# Supplementary material for: C9C5 positive mature oligodendrocytes are a source of Sonic Hedgehog in the mouse brain
Source: PubMed Central journal article supplement (PMC7032736; doi:10.1371/journal.pone.0229362), 2020-02-20

Left part of Figure 1A

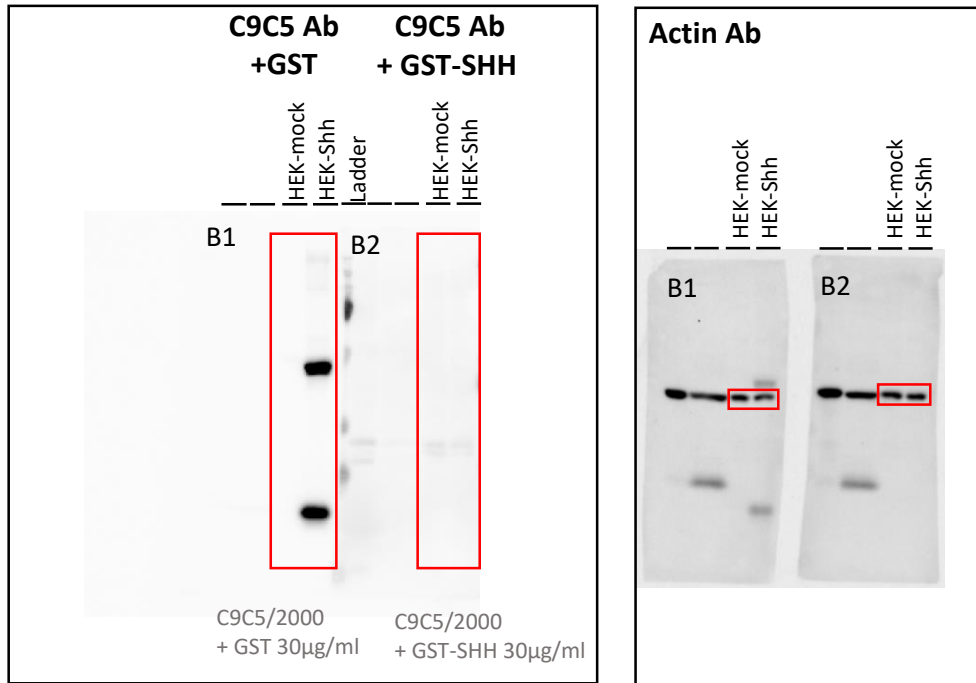

Right part of Figure 1A

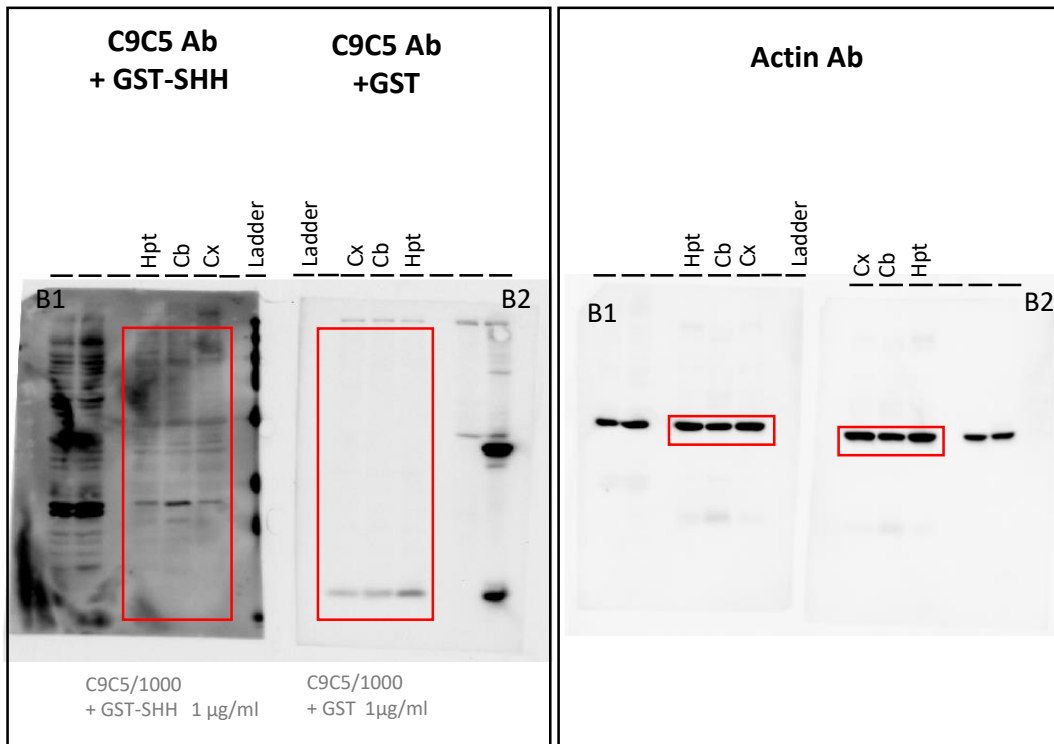

Uncropped gels, from Image lab software for Figure S1, Tirou et al. PlosOne

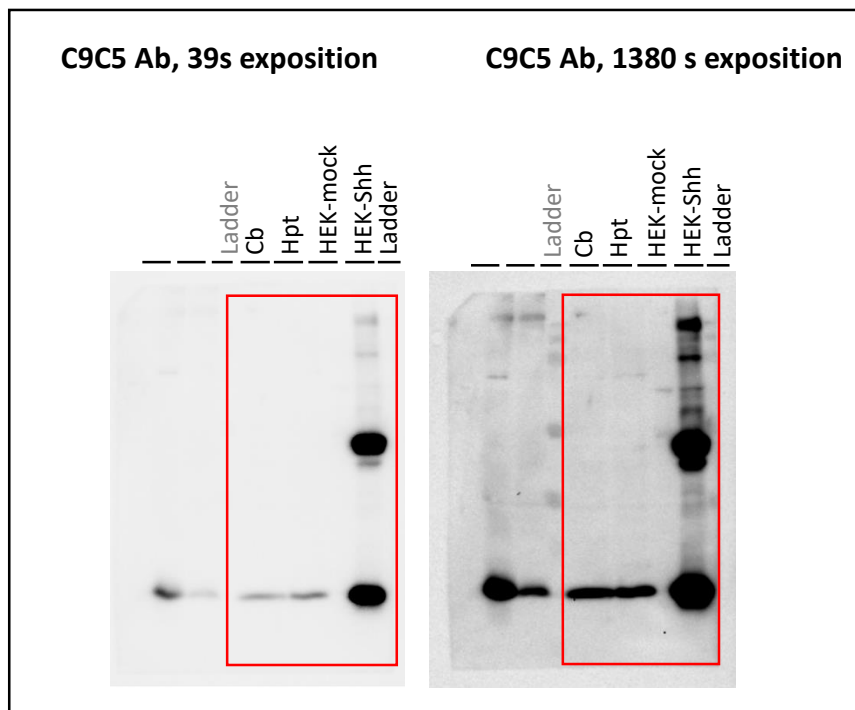

Supplement: pone.0229362.s004.pdf [file pone.0229362.s004.pdf]
